# Supplementary material
Source: PubMed Central journal article supplement (PMC5013766)
Supplement: rspb20160990supp1.pdf [file rspb20160990supp1.pdf]

Supplementary Table 1. Estimated tMRCA and clock rate for various bacterial pathogens

| Lineage                                        | Disease           | tMRCA (years ago) | Mean clock rate<br>(substitution per bp per year)                  | Citation |
|------------------------------------------------|-------------------|-------------------|--------------------------------------------------------------------|----------|
| <i>Salmonella enterica</i> serovar Typhi H58   | Typhoid fever     | 27                | $1.4 \times 10^{-7}$                                               | [1]      |
| <i>Staphylococcus aureus</i> EMRSA-15          | Epidemic MRSA     | 30                | $1.3 \times 10^{-6}$                                               | [2]      |
| <i>Vibrio cholerae</i> (7th pandemic)          | Epidemic cholera  | 60                | $8.3 \times 10^{-7}$                                               | [3]      |
| <i>Salmonella enterica</i> serovar Agona       | Food poisoning    | 80                | $9.3 \times 10^{-8}$                                               | [4]      |
| <i>Streptococcus equi</i>                      | Equine strangles  | 106               | $5.2 \times 10^{-7}$                                               | [5]      |
| <i>Vibrio cholerae</i> (epidemic)              | Epidemic cholera  | 200               | ND                                                                 | [6]      |
| <i>Salmonella enterica</i> serovar Paratyphi A | Enteric fever     | 450               | $1.3 \times 10^{-7}$                                               | [7]      |
| <i>Shigella sonnei</i>                         | Dysentery         | 350               | $6.0 \times 10^{-7}$                                               | [8]      |
| <i>Mycobacterium tuberculosis</i> (Lineage 4)  | Tuberculosis      | 1,600             | $5.0 \times 10^{-8}$                                               | [9]      |
| <i>Mycobacterium leprae</i>                    | Leprosy           | 3,100             | $6.1 \times 10^{-9}$                                               | [10]     |
| <i>Yersinia pestis</i>                         | Plague            | 5,000             | $8.6 \times 10^{-9}$                                               | [11,12]  |
| <i>Mycobacterium tuberculosis</i> Complex      | Tuberculosis      | 5,200             | $4.9 \times 10^{-8}$                                               | [9,13]   |
| <i>Helicobacter pylori</i>                     | Gastritis, ulcers | 100,000           | $3 \times 10^{-4}$ (short term) – $2.6 \times 10^{-7}$ (long term) | [14-18]  |

## Reference List

1. Wong, V. K. *et al.*. 2015 Phylogeographical analysis of the dominant multidrug-resistant H58 clade of *Salmonella* Typhi identifies inter- and intracontinental transmission events. *Nature Genet* 47, 632-639.
2. Holden, M. T. G. *et al.*. 2013 A genomic portrait of the emergence, evolution and global spread of a methicillin resistant *Staphylococcus aureus* pandemic. *Genome Res* 23, 653-664.
3. Didelot, X., Pang, B., Zhou, Z., McCann, A., Ni, P., Li, D., Achtman, M., and Kan, B. 2015 The role of China in the global spread of the current cholera pandemic. *PLoS Genet* 11, e1005072.
4. Zhou, Z., McCann, A., Litrup, E., Murphy, R., Cormican, M., Fanning, S., Brown, D., Guttman, D. S., Brisse, S., and Achtman, M. 2013 Neutral genomic microevolution of a recently emerged pathogen, *Salmonella enterica* serovar Agona. *PLoS Genet* 9, e1003471.
5. Harris, S. R., Robinson, C., Steward, K. F., Webb, K. S., Paillot, R., Parkhill, J., Holden, M. T., and Waller, A. S. 2015 Genome specialization and decay of the strangles pathogen, *Streptococcus equi*, is driven by persistent infection. *Genome Res* 25, 1360-1371.
6. Devault, A. M. *et al.*. 2014 Second-pandemic strain of *Vibrio cholerae* from the Philadelphia cholera outbreak of 1849. *N Engl J Med* 370, 334-340.

7. Zhou, Z., McCann, A., Weill, F. X., Blin, C., Nair, S., Wain, J., Dougan, G., and Achtman, M. 2014 Transient Darwinian selection in *Salmonella enterica* serovar Paratyphi A during 450 years of global spread of enteric fever. *Proc Natl Acad Sci U S A* 111, 12199-12204.
8. Holt, K. E. *et al.*. 2012 *Shigella sonnei* genome sequencing and phylogenetic analysis indicate recent global dissemination from Europe. *Nature Genet* 44, 1056-1059.
9. Kay, G. L. *et al.*. 2015 Eighteenth-century genomes show that mixed infections were common at time of peak tuberculosis in Europe. *Nat Commun* 6, 6717.
10. Schuenemann, V. J. *et al.*. 2013 Genome-wide comparison of medieval and modern *Mycobacterium leprae*. *Science* 341, 179-183.
11. Cui, Y. *et al.*. 2013 Historical variations in mutation rate in an epidemic pathogen, *Yersinia pestis*. *Proc Natl Acad Sci USA* 110, 577-582.
12. Rasmussen, S. *et al.*. 2015 Early divergent strains of *Yersinia pestis* in Eurasia 5,000 years ago. *Cell* 163, 571-582.
13. Bos, K. I. *et al.*. 2014 Pre-Columbian mycobacterial genomes reveal seals as a source of New World human tuberculosis. *Nature* 514, 494-497.
14. Linz, B., Windsor, H. M., McGraw, J. J., Hansen, L. M., Gajewski, J. P., Tomsho, L. P., Hake, C. M., Solnick, J. V., Schuster, S. C., and Marshall, B. J. 2014 A mutation burst during the acute phase of *Helicobacter pylori* infection in humans and rhesus macaques. *Nat Commun* 5, 4165.

15. Didelot, X., Nell, S., Yang, I., Woltemate, S., van der Merwe, S., and Suerbaum, S. 2013  
Genomic evolution and transmission of *Helicobacter pylori* in two South African families. *Proc Natl Acad Sci U S A* 110, 13880-13885.
16. Maixner, F. et al.. 2016 The 5300-year-old *Helicobacter pylori* genome of the Iceman. *Science* 351, 162-165.
17. Morelli, G., Didelot, X., Kusecek, B., Schwarz, S., Falush, D., Bahlawane, C., Suerbaum, S., and Achtman, M. 2010 Microevolution of *Helicobacter pylori* during prolonged infection of single hosts and within families. *PLoS Genet* 6, e1001036.
18. Moodley, Y. et al.. 2012 Age of the association between *Helicobacter pylori* and man. *PLoS Pathog* 8, e1002693.
